# Supplementary material for: A P2rx7 Passenger Mutation Affects the Vitality and Function of T cells in Congenic Mice
Source: PubMed Central journal article supplement — iScience. 2020 Nov 27;23(12):101870. doi: 10.1016/j.isci.2020.101870 (PMC7733020; doi:10.1016/j.isci.2020.101870), 2020-11-27
Supplement: mmc1.pdf [file mmc1.pdf]

iScience, Volume 23

## Supplemental Information

### **A *P2rx7* Passenger Mutation Affects the Vitality and Function of T cells in Congenic Mice**

**Marco Er-Lukowiak, Yinghui Duan, Francois Rassendren, Lauriane Ulmann, Annette Nicke, Friederike Ufer, Manuel A. Friese, Friedrich Koch-Nolte, Tim Magnus, and Björn Rissiek**

## Transparent Methods

### *Mice*

8 to 18 weeks old male and female mice on the C57BL/6 and Balb/c background were used in this study. P2rx4<sup>tm1Rass</sup> on the B6 background were obtained from the lab of Francois Rassendren. Balb/c-P2X4<sup>ko</sup> mice were generated by backcrossing B6-P2X4<sup>ko</sup> mice with Balb/c-WT mice for 13 generations. In some experiments cells from B6-P2X7<sup>ko</sup> mice (P2rx7<sup>tm1Gab</sup>) were used as negative control for P2X7 cell surface staining. Hvcn1<sup>Gt(RRRN293)Byg</sup> on the B6 background were obtained from the lab of David Clapham. All mouse experiments were approved by the responsible regulatory committee (Hamburger Behörde für Gesundheit und Verbraucherschutz, Veterinärwesen/Lebensmittelsicherheit, ORG722, ORG983, G12/130). All experiments were performed according to the relevant guidelines and regulations.

### *Antibodies and flow cytometry*

For FACS analysis, the following antibodies were used: anti-CD3-Bv421-(clone 17A2, Biolegend), anti-CD4-Bv421 (clone RM 4-5, eBioscience), anti-CD8-FITC (clone 53-6.7, Biolegend), anti-CD25 PE (clone PC61, Biolegend), anti-CD27-APC (clone LG.3A10, Biolegend) and anti-P2X7-AF647 (clone Hano44, UKE) (Adriouch et al. 2005). Flow cytometric analyses were performed on a BD Fortessa (Beckton Dickinson) or a BD FACS CantoII (Beckton Dickinson).

### *Preparation of immune cells*

The isolation of immune cells was performed strictly at 4°C on ice. Spleen and peripheral lymph nodes were mashed through a cell strainer (50 mL falcon strainer, 70 µm, GBO) using a syringe piston. Single cell suspension was kept in FACS buffer containing 1 mM EDTA (Sigma) and 0.1 % bovine serum albumin (Sigma). Erythrocytes were lysed using an ACK lysis buffer (155 mM NH<sub>4</sub>Cl, 10 mM KHCO<sub>3</sub>, 0.1 mM EDTA, pH 7.2). For some T cell experiments, mice were injected (i.v.) with 50 µg of the ARTC2.2-blocking nanobody s+16a 30 min prior to sacrificing the mice in order to prevent ADP-ribosylation of P2X7 on T cells during cell preparation.

### *Quantitative real-time PCR*

RNA was extracted from FACS sorted immune cells using the RNeasy Plus Mini Kit (Qiagen) followed by cDNA synthesis using the Maxima First Strand cDNA Synthesis Kit (Thermo Fisher Scientific) as recommended by the respective supplier. RT-qPCR was performed on a Lightcycler 96 (Roche). A P2rx7-specific Taqman probe (Mm00440582\_m1; Thermo Scientific) was used to determine P2rx7 mRNA expression levels.

### *P2rx7 SNP sequencing*

Sequencing of a region flanking SNP rs48804829 in the *P2rx7* gene was performed using the primers P2x7\_P451L\_forw (gggaaaagtctgcaagttgtc) and P2x7\_P451L\_rev (gaagagcttgagggtggtg). The PCR product was purified with the PCR clean-up gel extraction kit (Macherey-Nagel) and send to Eurofins, Germany, for sequencing.

### *Monitoring P2X7 induced cell death on T cells*

T cells were isolated by flow cytometric cell sorting.  $5 \times 10^4$  cell were resuspended in 400  $\mu$ l complete RPMI medium containing propidium iodide PI (2.5  $\mu$ g/ml, ImmunoChemistry Technologies). Half of the sample was left at 4°C and the other half was incubated for 2 h at 37°C. Cell vitality was analyzed directly after incubation by flow cytometry.

### *Monitoring P2X7 shedding of CD27 on T cells*

Purified splenocytes from WT and P2X4ko mice were stained with lineage markers and anti-CD27 for 30 min, then washed and WT or P2X4ko cells were labeled with eFluor<sup>670</sup>. The labeled and unlabeled samples were mixed in a 1:1 ratio and aliquots were subjected to ATP dose response analyses (16-500  $\mu$ M ATP). For this, cells were incubated in the presence of ATP at 37°C for 15 minutes, samples without ATP were incubated at 4°C and 37°C as controls. Loss of CD27 from the cell surface was analyzed by flow cytometry.

For the real-time CD27 shedding measurements, WT or P2X4ko cells were labeled with eFluor<sup>670</sup>. The labeled and unlabeled samples were mixed in a 1:1 ratio and aliquots and cell surface CD27 expression was monitored on a flow cytometer while continuously increasing the sample temperature to 37°C using an infrared lamp (IR) lamp. A temperature of 37°C was reached after 7-8 min and kept constant while measuring continued for another 7-8 minutes

### *Monitoring P2X7-induced calcium uptake*

HEK cells stably transfected with expression plasmids for P2X7k 451L, P2X7k 451P, P2X7a 451L or P2X7a 451P were loaded with 2  $\mu$ M Fluo-4 (Invitrogen) for 20 min at 4°C and 10 min at 37°C, washed once with FACS buffer and resuspended in PBS supplemented with 0.9 mM CaCl<sub>2</sub> and 0.49 mM MgCl<sub>2</sub> (Invitrogen) and analyzed by flow cytometry. An IR lamp was used to maintain a constant sample temperature of 37°C. The baseline Fluo4 signal was measured for 2 minutes, then ATP was added to the sample at the indicated concentration and measuring continued for 3-4 minutes.

### *In vitro migration assay*

Th were isolated from WT and P2X4ko mice by FACS and one WT or P2X4ko Th were stained with Fluor<sup>670</sup>. Labeled and unlabeled cells were mixed in a 1:1 ratio, washed and resuspended in RPMI complete medium. 2 x 10<sup>5</sup> cells in 100 µl were transferred into the upper chamber of a trans-well plate (5µm pores, Corning). The lower chamber was prepared with either 150 µl RPMI complete medium or 150 µl RPMI complete medium containing SDF1α (100 ng/ml, Biolegend). The trans-well plate was placed in a 37°C incubator and cells were allowed to migrate for 2 h. Afterwards, vital cells (propidium iodide negative) in the upper and lower chamber were counted by flow cytometry.

### *Cytokine secretion assay*

For *in vitro* cytokine secretion assays CTL were isolated by FACS from spleen single cell suspensions. 5 x 10<sup>4</sup> cells were directly sorted in 200 µl RPMI complete medium and stimulated for 24 h in the presence of phorbol 12-myristate 13-acetate (PMA, 20 ng/ml, Invivogen) and ionomycin (1 µg/ml, Invivogen). Supernatants were analyzed for 13 cytokines (IFN-γ, TNF-α, IL-2, IL-4, IL-21, IL-22, IL-17A, IL-17F, IL-10, IL-9, IL-5 and IL-13) using the LEGENDplex mouse Th cytokine 13-plex kit (Biolegend).

### *In silico research and statistics*

mRNA sequencing data from CD4 T cells of inbred mouse strains was obtained from the immgen database (GSE60337) (Mostafavi et al. 2014). Details of *P2rx7* neighboring genes were obtained from BioMart on ensembl.org (Yates et al. 2020). For statistical analyses, GraphPad Prism 8 was used and two groups were compared using the student's t test.

## **References Transparent Methods**

Adriouch, S. et al., 2005. Probing the expression and function of the P2X7 purinoceptor with antibodies raised by genetic immunization. *Cellular Immunology*, 236(1-2), pp.72–77.

Mostafavi, S. et al., 2014. Variation and Genetic Control of Gene Expression in Primary Immunocytes across Inbred Mouse Strains. *Journal of Immunology*, 193(9), pp.4485–4496.

Yates, A.D. et al., 2020. Ensembl 2020. *Nucleic acids research*, 48(D1), pp.D682–D688.

## Supplementary Figures

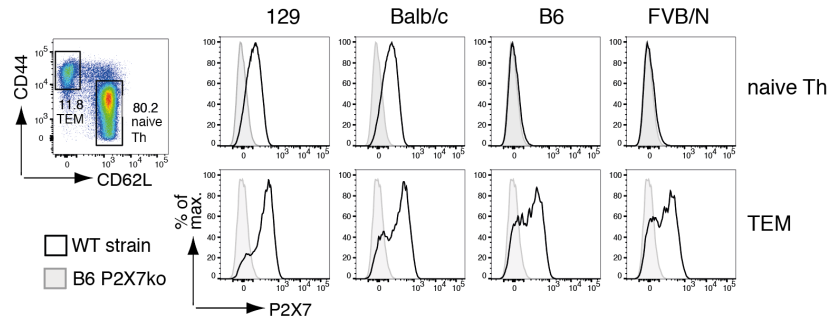

**Figure S1. P2X7 expression levels in naïve and effector/memory T cells (TEM) from different mouse strains.** Related to Figure 1. Flow cytometric analyses of cell surface P2X7 expression on CD4<sup>+</sup> naïve (CD62L<sup>+</sup>CD44<sup>low</sup>) and effector/memory (CD62L<sup>-</sup>CD44<sup>high</sup>) CD4<sup>+</sup> T cells (TEM) of 129, Balb/c, B6 and FVB/N mice.

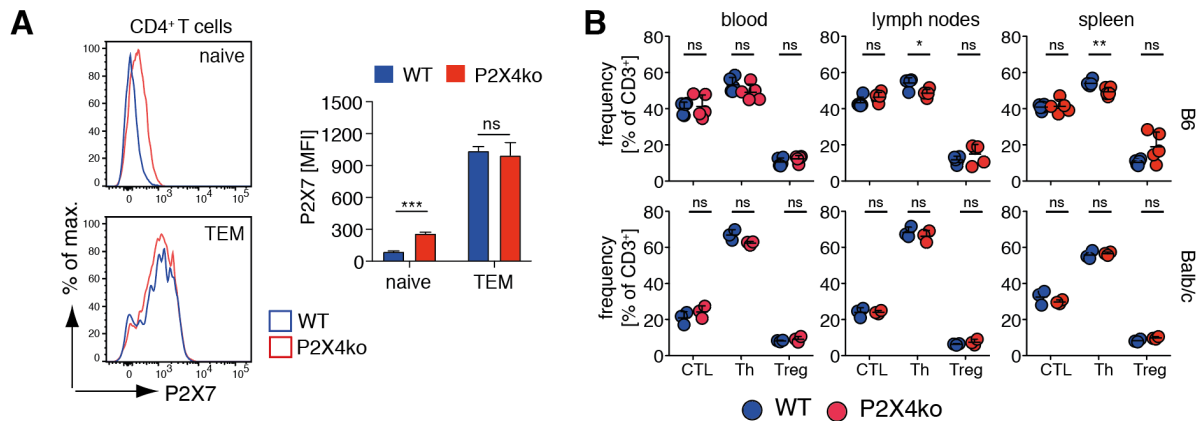

**Figure S2. Naïve and effector memory T cells P2X7 expression analyses and T cell frequencies in P2X4ko and WT mice.** Related to Figure 2. (A) Flow cytometric analyses of cell surface P2X7 expression on CD4<sup>+</sup> naïve (CD62L<sup>+</sup>CD44<sup>low</sup>) and effector/memory (CD62L<sup>-</sup>CD44<sup>high</sup>) T cells of B6 WT (blue) and P2X4ko (red) mice. (B) Frequencies of CTL, Th and Treg (n = 3-5) in relation to all CD3<sup>+</sup> T cells was determined in blood, peripheral lymph nodes and spleen of B6 and Balb/c P2X4ko (red) and WT mice (blue). Data are represented as mean  $\pm$  SD. Statistical comparison of two groups was performed by using the student's t test (p < 0.05 = \* / p < 0.01 = \*\* / p < 0.001 = \*\*\*, ns = no significant).

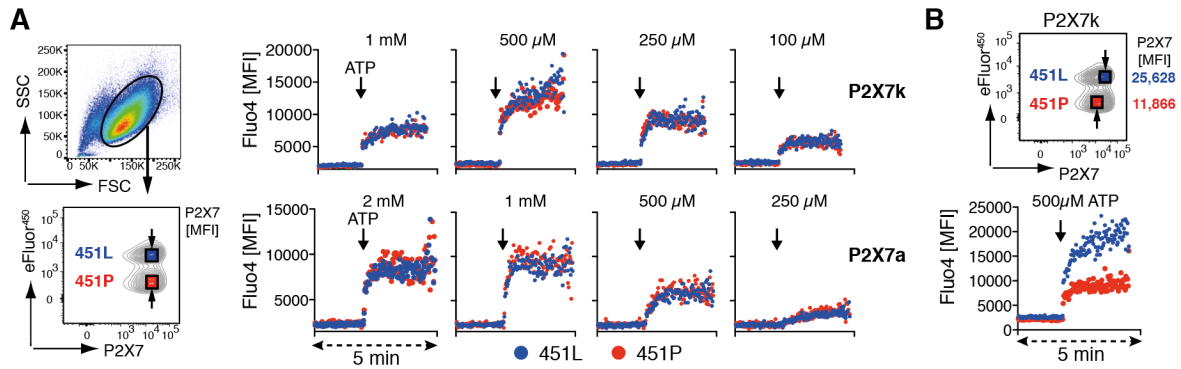

**Figure S3. The intensity of the calcium influx depends on the expression level of P2X7.** Related to Figure 3. (A) HEK cells stably transfected with P2X7 451L or 451P (P2X7k or P2X7a splice variant) were distinguished by eFluor<sup>450</sup> labeling and P2X7 expression level were determined by co-staining with an anti-P2X7 antibody (clone RH23A44). Comparative P2X7 451P/L HEK cell analyses were adjusted for P2X7 expression levels by creating a gating region with a comparable P2X7 mean fluorescence intensity (MFI). For the analyses, mixed HEK cells were loaded with Fluo4 and measured in a real-time flow cytometry assay with 2 min baseline recording followed by 3 min ATP stimulation (100  $\mu$ M – 2 mM). Calcium influx was measured by increase in Fluo4 MFI. (B) Analysis of the 500  $\mu$ M ATP P2X7k sample was repeated with a skewed adjustment of P2X7 expression.

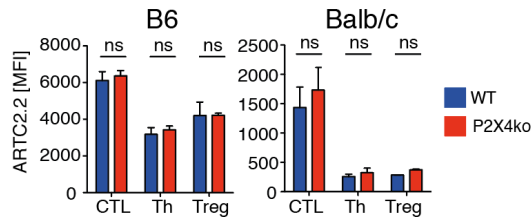

**Figure S4. ARTC2.2 expression is comparable on P2X4ko and WT T cells.** Related to Figure 3. Flow cytometric analyses of cell surface ARTC2.2 expression on CTL, Th and Treg of WT and P2X4ko mice on the B6 and Balb/c background. The mean fluorescence intensity (MFI) of ARTC2.2 on the different T cell populations from WT and P2X4ko mice (n = 3) was compared. Data are represented as mean  $\pm$  SD. Statistical comparison of two groups was performed by using the student's t test (p < 0.05 = \* / p < 0.01 = \*\* / p < 0.001 = \*\*\*, ns = no significant).

**Table S1: 129-based knockout mice for *P2rx7* neighboring genes. Related to Figure 6.**

| gene name       | gene start (bp) | gene end (bp) | distance to <i>P2rx7</i> (bp) | gene description                                                                          | 129-based KO mice                                                                                                                                                           |
|-----------------|-----------------|---------------|-------------------------------|-------------------------------------------------------------------------------------------|-----------------------------------------------------------------------------------------------------------------------------------------------------------------------------|
| <i>Rasa1</i>    | 120648812       | 120679597     | -1964314                      | RAS protein activator like 1 (GAP1 like) [Source:MGI Symbol;Acc:MGI:1330842]              | ---                                                                                                                                                                         |
| <i>Dtx1</i>     | 120680202       | 120711927     | -1931984                      | deltex 1, E3 ubiquitin ligase [Source:MGI Symbol;Acc:MGI:1352744]                         | <i>Dtx1tm1.1Mzl</i><br><i>Dtx1tm1Crey</i><br><i>Dtx1tm1Mjb</i>                                                                                                              |
| <i>Oas2</i>     | 120730333       | 120749853     | -1894058                      | 2'-5' oligoadenylate synthetase 2 [Source:MGI Symbol;Acc:MGI:2180852]                     | <i>Oas2Gt(OST112989)Lex</i>                                                                                                                                                 |
| <i>Oas3</i>     | 120753098       | 120777661     | -1866250                      | 2'-5' oligoadenylate synthetase 3 [Source:MGI Symbol;Acc:MGI:2180850]                     | ---                                                                                                                                                                         |
| <i>Oas1e</i>    | 120786226       | 120795530     | -1848381                      | 2'-5' oligoadenylate synthetase 1E [Source:MGI Symbol;Acc:MGI:2180856]                    | ---                                                                                                                                                                         |
| <i>Oas1c</i>    | 120800194       | 120812514     | -1831397                      | 2'-5' oligoadenylate synthetase 1C [Source:MGI Symbol;Acc:MGI:2149633]                    | ---                                                                                                                                                                         |
| <i>Oas1b</i>    | 120812635       | 120824163     | -1819748                      | 2'-5' oligoadenylate synthetase 1B [Source:MGI Symbol;Acc:MGI:97430]                      | <i>Oas1b1.1Brin</i>                                                                                                                                                         |
| <i>Oas1f</i>    | 120847367       | 120857986     | -1785925                      | 2'-5' oligoadenylate synthetase 1F [Source:MGI Symbol;Acc:MGI:2180855]                    | <i>Oas1fGt(OST425760)Lex</i>                                                                                                                                                |
| <i>Oas1h</i>    | 120861421       | 120873506     | -1770405                      | 2'-5' oligoadenylate synthetase 1H [Source:MGI Symbol;Acc:MGI:2180853]                    | ---                                                                                                                                                                         |
| <i>Oas1g</i>    | 120876142       | 120887613     | -1756298                      | 2'-5' oligoadenylate synthetase 1G [Source:MGI Symbol;Acc:MGI:97429]                      | ---                                                                                                                                                                         |
| <i>Oas1a</i>    | 120896256       | 120907521     | -1736390                      | 2'-5' oligoadenylate synthetase 1A [Source:MGI Symbol;Acc:MGI:2180860]                    | ---                                                                                                                                                                         |
| <i>Oas1d</i>    | 120914536       | 120921652     | -1722259                      | 2'-5' oligoadenylate synthetase 1D [Source:MGI Symbol;Acc:MGI:2140770]                    | <i>Oas1d1tm1Zuk</i>                                                                                                                                                         |
| <i>Rph3a</i>    | 120940499       | 121010092     | -1633819                      | rabphilin 3A [Source:MGI Symbol;Acc:MGI:102788]                                           | <i>Rph3atm1Sud</i>                                                                                                                                                          |
| <i>Ptpn11</i>   | 121130533       | 121191397     | -1452514                      | protein tyrosine phosphatase, non-receptor type 11 [Source:MGI Symbol;Acc:MGI:99511]      | <i>Ptpn11tm1.1Rbns</i><br><i>Ptpn11tm1.1Wbm</i><br><i>Ptpn11tm1Bgn</i><br><i>Ptpn11tm1Rbn</i><br><i>Ptpn11tm1Yan</i>                                                        |
| <i>Rpl6</i>     | 121204481       | 121209241     | -1434670                      | ribosomal protein L6 [Source:MGI Symbol;Acc:MGI:108057]                                   | <i>Rpl6Gt(OST1622)Lex</i><br><i>Rpl6Gt(PST17838)Mfgc</i>                                                                                                                    |
| <i>Hectd4</i>   | 121220219       | 121368577     | -1275334                      | HECT domain E3 ubiquitin protein ligase 4 [Source:MGI Symbol;Acc:MGI:3647820]             | <i>Hectd4Gt(255G8)Cmhd</i><br><i>Hectd4Gt(BC0299)Wtsi</i><br><i>Hectd4Gt(BGA536)Byg</i>                                                                                     |
| <i>Trafd1</i>   | 121371725       | 121385632     | -1258279                      | TRAF type zinc finger domain containing 1 [Source:MGI Symbol;Acc:MGI:1923551]             | <i>Trafd1tm1Ayo</i>                                                                                                                                                         |
| <i>Naa25</i>    | 121397936       | 121444378     | -1199533                      | N(alpha)-acetyltransferase 25, NatB auxiliary subunit [Source:MGI Symbol;Acc:MGI:2442563] | <i>Naa25Gt(RRK280)Byg</i><br><i>Naa25Gt(AL0004)Wtsi</i>                                                                                                                     |
| <i>Erp29</i>    | 121428590       | 121452506     | -1191405                      | endoplasmic reticulum protein 29 [Source:MGI Symbol;Acc:MGI:1914647]                      | <i>Erp29tm1Dfer</i><br><i>Erp29Gt(KST171)Byg</i><br><i>Erp29Gt(G014A01)Wrst</i>                                                                                             |
| <i>Tmem116</i>  | 121451893       | 121524183     | -1119728                      | transmembrane protein 116 [Source:MGI Symbol;Acc:MGI:1924712]                             | <i>Tmem116Gt(OST44984)Lex</i><br><i>Tmem116Gt(PST12765)Mfgc</i>                                                                                                             |
| <i>Adam1b</i>   | 121500098       | 121503435     | -1140476                      | a disintegrin and metallopeptidase domain 1b [Source:MGI Symbol;Acc:MGI:2429506]          | ---                                                                                                                                                                         |
| <i>Adam1a</i>   | 121518576       | 121545482     | -1098429                      | a disintegrin and metallopeptidase domain 1a [Source:MGI Symbol;Acc:MGI:2429504]          | <i>Adam1b1tm1Tba</i>                                                                                                                                                        |
| <i>Mapkapk5</i> | 121525038       | 121545905     | -1098006                      | MAP kinase-activated protein kinase 5 [Source:MGI Symbol;Acc:MGI:1333110]                 | <i>Mapkapk5tm1Mgl</i><br><i>Mapkapk5tm1Pqs</i>                                                                                                                              |
| <i>Aldh2</i>    | 121566027       | 121593824     | -1050087                      | aldehyde dehydrogenase 2, mitochondrial [Source:MGI Symbol;Acc:MGI:99600]                 | <i>Aldh2Gt(OST7285)Lex</i><br><i>Aldh2Gt(D053A10)Wrst</i>                                                                                                                   |
| <i>Acad12</i>   | 121596775       | 121618938     | -1024973                      | acyl-Coenzyme A dehydrogenase family, member 12 [Source:MGI Symbol;Acc:MGI:2443320]       | <i>Acad12Gt(OST300106)Lex</i>                                                                                                                                               |
| <i>Acad10</i>   | 121621026       | 121660514     | -983397                       | acyl-Coenzyme A dehydrogenase family, member 10 [Source:MGI Symbol;Acc:MGI:1919235]       | <i>Acad10Gt(OST448289)Lex</i>                                                                                                                                               |
| <i>Brp</i>      | 121660563       | 121687256     | -956655                       | BRCA1 associated protein [Source:MGI Symbol;Acc:MGI:1919649]                              | ---                                                                                                                                                                         |
| <i>Atxn2</i>    | 121711337       | 121816493     | -827418                       | ataxin 2 [Source:MGI Symbol;Acc:MGI:1277223]                                              | <i>Atxn2tm1.1Geno</i><br><i>Atxn2tm1Pit</i><br><i>Atxn2tm2.1Geno</i><br><i>Atxn2tm1.1Aub</i><br><i>Atxn2tm2.1Aub</i><br><i>Atxn2tm3.1Aub</i><br><i>Atxn2Gt(A014A02)Wrst</i> |
| <i>Sh2b3</i>    | 121815488       | 121837646     | -806265                       | SH2B adaptor protein 3 [Source:MGI Symbol;Acc:MGI:893598]                                 | <i>Sh2b3tm1Paw</i><br><i>Sh2b3tm1Rmp</i>                                                                                                                                    |
| <i>Pheta1</i>   | 121848984       | 121854632     | -789279                       | PH domain containing endocytic trafficking adaptor 1 [Source:MGI Symbol;Acc:MGI:2442708]  | ---                                                                                                                                                                         |
| <i>Cux2</i>     | 121856366       | 122050102     | -593809                       | cut-like homeobox 2 [Source:MGI Symbol;Acc:MGI:107321]                                    | <i>Cux2tm1.1Nieto</i>                                                                                                                                                       |
| <i>Myl2</i>     | 122100951       | 122113472     | -530439                       | myosin, light polypeptide 2, regulatory, cardiac, slow [Source:MGI Symbol;Acc:MGI:97272]  | <i>Myl2tm1(cre)Krc</i><br><i>Myl2tm1(Hand1)Tana</i><br><i>Myl2tm1.1Chen</i><br><i>Myl2tm2.1Chen</i>                                                                         |
| <i>Ccdc63</i>   | 122108040       | 122140823     | -503088                       | coiled-coil domain containing 63 [Source:MGI Symbol;Acc:MGI:3607777]                      | ---                                                                                                                                                                         |
| <i>Ppp1cc</i>   | 122158278       | 122175273     | -468638                       | protein phosphatase 1 catalytic subunit gamma [Source:MGI Symbol;Acc:MGI:104872]          | <i>Ppp1cctm1Lex</i><br><i>Ppp1cctm1Var</i>                                                                                                                                  |
| <i>Hvcn1</i>    | 122206804       | 122242297     | -401614                       | hydrogen voltage-gated channel 1 [Source:MGI Symbol;Acc:MGI:1921346]                      | <i>Hvcn1Gt(RRN293)Byg</i>                                                                                                                                                   |
| <i>Tctn1</i>    | 122237848       | 122264460     | -379451                       | tectonic family member 1 [Source:MGI Symbol;Acc:MGI:3603820]                              | ---                                                                                                                                                                         |
| <i>Pptc7</i>    | 122284365       | 122324281     | -319630                       | PTC7 protein phosphatase homolog [Source:MGI Symbol;Acc:MGI:2444593]                      | ---                                                                                                                                                                         |
| <i>Rad9b</i>    | 122323223       | 122354233     | -289678                       | RAD9 checkpoint clamp component B [Source:MGI Symbol;Acc:MGI:2385231]                     | <i>Rad9b1tm1Lieb</i>                                                                                                                                                        |
| <i>Vps29</i>    | 122354369       | 122364984     | -278927                       | VPS29 retromer complex component [Source:MGI Symbol;Acc:MGI:1928344]                      | <i>Vps29Gt(OST309649)Lex</i>                                                                                                                                                |

|                     |                  |                  |          |                                                                                                                     |                                                                                                                    |
|---------------------|------------------|------------------|----------|---------------------------------------------------------------------------------------------------------------------|--------------------------------------------------------------------------------------------------------------------|
| <i>Fam216a</i>      | 122364580        | 122372364        | -271547  | family with sequence similarity 216, member A [Source:MGI Symbol;Acc:MGI:1916198]                                   | ---                                                                                                                |
| <i>Gpn3</i>         | 122371876        | 122382902        | -261009  | GNP-loop GTPase 3 [Source:MGI Symbol;Acc:MGI:1289326]                                                               | ---                                                                                                                |
| <i>Arpc3</i>        | 122391878        | 122414184        | -229727  | actin related protein 2/3 complex, subunit 3 [Source:MGI Symbol;Acc:MGI:1928375]                                    | <i>Arpc3tm1Jtak</i>                                                                                                |
| <i>Anapc7</i>       | 122421693        | 122444912        | -198999  | anaphase promoting complex subunit 7 [Source:MGI Symbol;Acc:MGI:1929711]                                            | ---                                                                                                                |
| <i>Atp2a2</i>       | 122453513        | 122502225        | -141686  | ATPase, Ca++ transporting, cardiac muscle, slow twitch 2 [Source:MGI Symbol;Acc:MGI:88110]                          | <i>Atp2a2tm1.1Iemr</i><br><i>Atp2a2tm1Fwuy</i><br><i>Atp2a2tm1Ges</i>                                              |
| <i>Ift81</i>        | 122550204        | 122614518        | -29393   | intraflagellar transport 81 [Source:MGI Symbol;Acc:MGI:1098597]                                                     | ---                                                                                                                |
| <b><i>P2rx7</i></b> | <b>122643911</b> | <b>122691432</b> | <b>0</b> | <b>purinergic receptor P2X, ligand-gated ion channel, 7 [Source:MGI Symbol;Acc:MGI:1339957]</b>                     | <i>P2rx7tm1Lex</i><br><i>P2rx7tm1Gab</i><br><i>P2rx7tm1.2Jde</i><br><i>P2rx7Gt(OST90373)Lex</i>                    |
| <i>P2rx4</i>        | 122707544        | 122729738        | 16112    | purinergic receptor P2X, ligand-gated ion channel 4 [Source:MGI Symbol;Acc:MGI:1338859]                             | <i>P2rx4tm1Rass</i><br><i>P2rx4tm1Dgen</i>                                                                         |
| <i>Camkk2</i>       | 122731170        | 122779409        | 39738    | calcium/calmodulin-dependent protein kinase kinase 2, beta [Source:MGI Symbol;Acc:MGI:2444812]                      | <i>Camkk2tm1Kpg</i><br><i>Camkk2tm1Shyy</i><br><i>Camkk2tm1Tch</i><br><i>Camkk2tm2.1Kpg</i><br><i>Camkk2tm2Kpg</i> |
| <i>Anapc5</i>       | 122787459        | 122821339        | 96027    | anaphase-promoting complex subunit 5 [Source:MGI Symbol;Acc:MGI:1929722]                                            | ---                                                                                                                |
| <i>Rnf34</i>        | 122850048        | 122871291        | 158616   | ring finger protein 34 [Source:MGI Symbol;Acc:MGI:2153340]                                                          | ---                                                                                                                |
| <i>Kdm2b</i>        | 122870665        | 122989823        | 179233   | lysine (K)-specific demethylase 2B [Source:MGI Symbol;Acc:MGI:1354737]                                              | <i>Kdm2btm1.1Atz</i><br><i>Kdm2btm1.1Bes</i><br><i>Kdm2btm1Nobu</i>                                                |
| <i>Orai1</i>        | 123015074        | 123030456        | 323642   | ORAI calcium release-activated calcium modulator 1 [Source:MGI Symbol;Acc:MGI:1925542]                              | <i>Orai1tm1.1Ygwa</i>                                                                                              |
| <i>Morn3</i>        | 123035769        | 123047016        | 344337   | MORN repeat containing 3 [Source:MGI Symbol;Acc:MGI:1922140]                                                        | ---                                                                                                                |
| <i>Tmem120b</i>     | 123068415        | 123117749        | 376983   | transmembrane protein 120B [Source:MGI Symbol;Acc:MGI:3603158]                                                      | ---                                                                                                                |
| <i>Rhof</i>         | 123103044        | 123132692        | 411612   | ras homolog family member F (in filopodia) [Source:MGI Symbol;Acc:MGI:1345629]                                      | ---                                                                                                                |
| <i>Setd1b</i>       | 123142193        | 123168629        | 450761   | SET domain containing 1B [Source:MGI Symbol;Acc:MGI:2652820]                                                        | <i>Setd1btm1.1Afst</i><br><i>Setd1btm1Afst</i>                                                                     |
| <i>Psmc9</i>        | 123169413        | 123250131        | 477981   | proteasome (prosome, macropain) 26S subunit, non-ATPase, 9 [Source:MGI Symbol;Acc:MGI:1914401]                      | ---                                                                                                                |
| <i>Hpd</i>          | 123171807        | 123182727        | 480375   | 4-hydroxyphenylpyruvic acid dioxygenase [Source:MGI Symbol;Acc:MGI:96213]                                           | ---                                                                                                                |
| <i>Wdr66</i>        | 123252102        | 123327484        | 560670   | WD repeat domain 66 [Source:MGI Symbol;Acc:MGI:1918495]                                                             | ---                                                                                                                |
| <i>Bcl7a</i>        | 123343834        | 123374992        | 652402   | B cell CLL/lymphoma 7A [Source:MGI Symbol;Acc:MGI:1924295]                                                          | ---                                                                                                                |
| <i>Mlxip</i>        | 123394798        | 123457932        | 703366   | MLX interacting protein [Source:MGI Symbol;Acc:MGI:2141183]                                                         | <i>Mlxiptm1.1Lchan</i><br><i>Mlxiptm1.2Lchan</i>                                                                   |
| <i>Rpl31-ps6</i>    | 123466509        | 123466886        | 775077   | ribosomal protein L31, pseudogene 6 [Source:MGI Symbol;Acc:MGI:3783190]                                             | ---                                                                                                                |
| <i>Il31</i>         | 123480157        | 123489489        | 788725   | interleukin 31 [Source:MGI Symbol;Acc:MGI:1923649]                                                                  | ---                                                                                                                |
| <i>Lrrc43</i>       | 123489305        | 123508205        | 797873   | leucine rich repeat containing 43 [Source:MGI Symbol;Acc:MGI:2685907]                                               | ---                                                                                                                |
| <i>Diablo</i>       | 123509765        | 123524176        | 818333   | diablo, IAP-binding mitochondrial protein [Source:MGI Symbol;Acc:MGI:1913843]                                       | <i>Diablotm1Mak</i>                                                                                                |
| <i>B3gnt4</i>       | 123510460        | 123511882        | 819028   | UDP-GlcNAc:betaGal beta-1,3-N-acetylglucosaminyltransferase 4 [Source:MGI Symbol;Acc:MGI:2680208]                   | ---                                                                                                                |
| <i>Vps33a</i>       | 123528659        | 123573038        | 837227   | VPS33A CORVET/HOPS core subunit [Source:MGI Symbol;Acc:MGI:1924823]                                                 | ---                                                                                                                |
| <i>Clip1</i>        | 123577795        | 123684618        | 886363   | CAP-GLY domain containing linker protein 1 [Source:MGI Symbol;Acc:MGI:1928401]                                      | <i>Clip1tm1.1Gal</i><br><i>Clip1tm1Gal</i>                                                                         |
| <i>Zcchc8</i>       | 123698294        | 123721100        | 1006862  | zinc finger, CCHC domain containing 8 [Source:MGI Symbol;Acc:MGI:1917900]                                           | ---                                                                                                                |
| <i>Rsrc2</i>        | 123728426        | 123749414        | 1036994  | arginine/serine-rich coiled-coil 2 [Source:MGI Symbol;Acc:MGI:1913489]                                              | ---                                                                                                                |
| <i>Kntc1</i>        | 123749716        | 123821593        | 1058284  | kinetochore associated 1 [Source:MGI Symbol;Acc:MGI:2673709]                                                        | <i>Kntc1Gt(OST40060)Lex</i>                                                                                        |
| <i>Hcar2</i>        | 123863570        | 123865499        | 1172138  | hydroxycarboxylic acid receptor 2 [Source:MGI Symbol;Acc:MGI:1933383]                                               | <i>Hcar2tm1Lex</i><br><i>Hcar2tm1Soff</i>                                                                          |
| <i>Hcar1</i>        | 123876736        | 123880020        | 1185304  | hydroxycarboxylic acid receptor 1 [Source:MGI Symbol;Acc:MGI:2441671]                                               | ---                                                                                                                |
| <i>Denr</i>         | 123907175        | 123928835        | 1215743  | density-regulated protein [Source:MGI Symbol;Acc:MGI:1915434]                                                       | <i>DenrGt(CSI770)Byg</i><br><i>DenrGt(OST114)Lex</i>                                                               |
| <i>Ccdc62</i>       | 123930679        | 123969895        | 1239247  | coiled-coil domain containing 62 [Source:MGI Symbol;Acc:MGI:2684996]                                                | ---                                                                                                                |
| <i>Hip1r</i>        | 123973628        | 124005558        | 1282196  | huntingtin interacting protein 1 related [Source:MGI Symbol;Acc:MGI:1352504]                                        | <i>Hip1rtm1Tsr</i>                                                                                                 |
| <i>Vps37b</i>       | 124004641        | 124032270        | 1313209  | vacuolar protein sorting 37B [Source:MGI Symbol;Acc:MGI:1916724]                                                    | ---                                                                                                                |
| <i>Abcb9</i>        | 124061530        | 124095798        | 1370098  | ATP-binding cassette, sub-family B (MDR/TAP), member 9 [Source:MGI Symbol;Acc:MGI:1861729]                          | <i>Abcb9Gt(231G11)Cmhd</i>                                                                                         |
| <i>Ogfod2</i>       | 124112297        | 124115483        | 1420865  | 2-oxoglutarate and iron-dependent oxygenase domain containing 2 [Source:MGI Symbol;Acc:MGI:1913877]                 | ---                                                                                                                |
| <i>Arl6ip4</i>      | 124116089        | 124118196        | 1424657  | ADP-ribosylation factor-like 6 interacting protein 4 [Source:MGI Symbol;Acc:MGI:1929500]                            | <i>Arl6ip4Gt(OST31151)Lex</i>                                                                                      |
| <i>Pitpnm2</i>      | 124118690        | 124249760        | 1427258  | phosphatidylinositol transfer protein, membrane-associated 2 [Source:MGI Symbol;Acc:MGI:1336192]                    | <i>Pitpnm2tm1Tlii</i>                                                                                              |
| <i>Pitpnm2os2</i>   | 124194907        | 124200346        | 1503475  | phosphatidylinositol transfer protein, membrane-associated 2, opposite strand 2 [Source:MGI Symbol;Acc:MGI:3840147] | ---                                                                                                                |
| <i>Pitpnm2os1</i>   | 124229725        | 124237137        | 1538293  | phosphatidylinositol transfer protein, membrane-associated 2, opposite strand 1 [Source:MGI Symbol;Acc:MGI:1923177] | ---                                                                                                                |



|                 |           |           |         |                                                                                                    |                                                                                                            |
|-----------------|-----------|-----------|---------|----------------------------------------------------------------------------------------------------|------------------------------------------------------------------------------------------------------------|
| <i>Mphosph9</i> | 124250959 | 124327972 | 1559527 | M-phase phosphoprotein 9 [Source:MGI Symbol;Acc:MGI:2443138]                                       | Mphosph9Gt(OST104880)Lex                                                                                   |
| <i>Cdk2ap1</i>  | 124345417 | 124363082 | 1653985 | CDK2 (cyclin-dependent kinase 2)-associated protein 1 [Source:MGI Symbol;Acc:MGI:1202069]          | Cdk2ap1tm1Dtw<br>Cdk2ap1Gt(D133C05)Wrst<br>Cdk2ap1Gt(OST35764)Lex                                          |
| <i>Sbno1</i>    | 124368702 | 124426001 | 1677270 | strawberry notch 1 [Source:MGI Symbol;Acc:MGI:2384298]                                             | Sbno1Gt(OST114991)Lex                                                                                      |
| <i>Kmt5a</i>    | 124439930 | 124462308 | 1748498 | lysine methyltransferase 5A [Source:MGI Symbol;Acc:MGI:1915206]                                    | Kmt5atm1.1Dare<br>Kmt5aGt(RRB075)Byg<br>Kmt5aGt(305D01)Cmhd<br>Kmt5aGt(D060E05)Wrst<br>Kmt5aGt(OST1973)Lex |
| <i>Rilpl2</i>   | 124463265 | 124478366 | 1771833 | Rab interacting lysosomal protein-like 2 [Source:MGI Symbol;Acc:MGI:1933112]                       | Rilpl2Gt(OST96650)Lex<br>Rilpl2Gt(450F7)Cmhd                                                               |
| <i>Snrnp35</i>  | 124483134 | 124491124 | 1791702 | small nuclear ribonucleoprotein 35 (U11/U12) [Source:MGI Symbol;Acc:MGI:1923417]                   | Snrnp35Gt(D178F04)Wrst<br>Snrnp35Gt(OST56118)Lex                                                           |
| <i>Rilpl1</i>   | 124493080 | 124531391 | 1801648 | Rab interacting lysosomal protein-like 1 [Source:MGI Symbol;Acc:MGI:1922945]                       | Rilpl1Gt(209A4)Cmhd<br>Rilpl1Gt(OST684)Lex                                                                 |
| <i>Tmed2</i>    | 124540695 | 124550506 | 1849263 | transmembrane p24 trafficking protein 2 [Source:MGI Symbol;Acc:MGI:1929269]                        | Tmed2Gt(OST78169)Lex                                                                                       |
| <i>Ddx55</i>    | 124552864 | 124569660 | 1861432 | DEAD (Asp-Glu-Ala-Asp) box polypeptide 55 [Source:MGI Symbol;Acc:MGI:1915098]                      | Ddx55Gt(CSH561)Byg<br>Ddx55Gt(OST406009)Lex                                                                |
| <i>Eif2b1</i>   | 124570213 | 124579131 | 1878781 | eukaryotic translation initiation factor 2B, subunit 1 (alpha) [Source:MGI Symbol;Acc:MGI:2384802] | Eif2b1Gt(OST132125)Lex                                                                                     |
| <i>Gtf2h3</i>   | 124579140 | 124597680 | 1887708 | general transcription factor IIH, polypeptide 3 [Source:MGI Symbol;Acc:MGI:1277143]                | Gtf2h3Gt(D144D12)Wrst<br>Gtf2h3Gt(RRG412)Byg                                                               |
| <i>Tctn2</i>    | 124598749 | 124627738 | 1907317 | tectonic family member 2 [Source:MGI Symbol;Acc:MGI:1915228]                                       | Tctn2tm1.1Reit<br>Tctn2Gt(OST378011)Lex                                                                    |
| <i>Atp6v0a2</i> | 124628576 | 124724455 | 1937144 | ATPase, H+ transporting, lysosomal V0 subunit A2 [Source:MGI Symbol;Acc:MGI:104855]                | ---                                                                                                        |
